# Supplementary material for: Fatal Pediatric Cerebral Malaria Is Associated with Intravascular Monocytes and Platelets That Are Increased with HIV Coinfection
Source: PubMed Central journal article supplement — mBio. 2015 Sep 22;6(5):e01390-15. doi: 10.1128/mBio.01390-15 (PMC4611030; doi:10.1128/mbio.01390-15), 2015-09-22
Supplement: mbo005152472st1.pdf [file mbo005152472st1.pdf]

|                                                  | CM1                   |                      | CM2                   |                      | CM3 and COC          |                       | ANOVA<br>or<br>Chi<br>Square |
|--------------------------------------------------|-----------------------|----------------------|-----------------------|----------------------|----------------------|-----------------------|------------------------------|
|                                                  | HIV+<br>(N=5)         | HIV neg<br>(N=5)     | HIV+<br>(N=5)         | HIV neg<br>(N=5)     | HIV+<br>(N=5)        | HIV neg<br>(N=5)      |                              |
| Age (months)                                     | 89<br>(74.5, 104.5)   | 44<br>(26, 67.5)     | 127<br>(62.5, 150)    | 31<br>(25.5, 37.5)   | 41<br>(35.5, 132)    | 34<br>(24.5, 51)      | <b>P=0.004</b>               |
| Sex<br>(% female)                                | 80                    | 100                  | 40                    | 60                   | 60                   | 20                    | NS                           |
| Admission<br>coma score                          | 1<br>(0.5, 1.5)       | 1<br>(0, 2)          | 1<br>(1, 2)           | 1<br>(0, 1.5)        | 1<br>(0, 4)          | 0<br>(0, 1.5)         | NS                           |
| Retinopathy<br>(% positive)                      | 100                   | 100                  | 100                   | 100                  | 0                    | 0                     | <b>P&lt;0.0001</b>           |
| Body Mass<br>Index<br>(kg/m <sup>2</sup> )       | 14.6<br>(13.9, 16.1)  | 13.6<br>(12.5, 15.7) | 15.2<br>(13.6, 15.9)  | 14.5<br>(12.5, 15.1) | 14.1<br>(12.7, 14.5) | 13.8<br>(12.5, 14.9)  | NS                           |
| Total WBC<br>(# x 10 <sup>3</sup> /μl)           | 13.9<br>(12, 15.8)    | 11.2<br>(7.3, 15.7)  | 13.9<br>(12, 22.5)    | 13.7<br>(6.5, 22)    | 11<br>(7.9, 11.5)    | 15.8<br>(10.2, 22.9)  | NS                           |
| Lymphocyte<br>count<br>(# x 10 <sup>3</sup> /μl) | 2.2<br>(1.3, 2.9)     | 2.3<br>(2, 5.5)      | 1.9<br>(1.3, 5.9)     | 4<br>(2.2, 5.8)      | 2.4<br>(2.1, 7)      | 2.1<br>(1.5, 2.4)     | NS                           |
| Monocyte<br>count<br>(# x 10 <sup>3</sup> /μl)   | 0.2<br>(0.1, 1.1)     | 1<br>(0.8, 2.5)      | 1.7<br>(0.6, 2.6)     | 1<br>(0.2, 1.8)      | 0.7<br>(0.6, 0.8)    | 0.3<br>(0.2, 1.2)     | NS                           |
| Parasitemia<br>(# x 10 <sup>3</sup> /μl)         | 52.5<br>(25.2, 217.6) | 49.2<br>(5.1, 717.6) | 47.0<br>(17.8, 389.9) | 2.8<br>(0.2, 170.4)  | (0, 79.7)            | 51.6<br>(12.6, 576.3) | NS*                          |
| Hematocrit<br>(%)                                | 22<br>(15.5, 35)      | 29<br>(22.5, 32)     | 21<br>(17.5, 25)      | 20<br>(14, 23)       | 30<br>(22.5, 31)     | 40<br>(32, 41)        | <b>P=0.004**</b>             |
| Platelet count<br>(# x 10 <sup>3</sup> /μl)      | 85.9<br>(39.5, 156.5) | 58.0<br>(31.5, 96.1) | 134.2<br>(56.5, 352)  | 42.6<br>(23, 82)     | 237.3<br>(166, 350)  | 90.1<br>(29.5, 233)   | P=0.06                       |
| Coma<br>duration<br>(hours)                      | 19<br>(12.5, 25.5)    | 25<br>(13, 34)       | 32<br>(22.7, 46.5)    | 24<br>(17, 38.5)     | 29<br>(6, 69)        | 17<br>(9, 31)         | P=NS                         |
| Duration of<br>illness<br>(hours)                | 40<br>(16.5, 66.5)    | 35<br>(31, 158.5)    | 48<br>(39.5, 86.5)    | 103<br>(84, 125)     | 68<br>(43.5, 323)    | 21<br>(12, 29.25)     | <b>P=0.02**</b>              |

Table S1.
