# Supplementary figures and images for: Fatal Pediatric Cerebral Malaria Is Associated with Intravascular Monocytes and Platelets That Are Increased with HIV Coinfection
Source: PubMed Central journal article supplement — mBio. 2015 Sep 22;6(5):e01390-15. doi: 10.1128/mBio.01390-15 (PMC4611030; doi:10.1128/mbio.01390-15), 2015-09-22

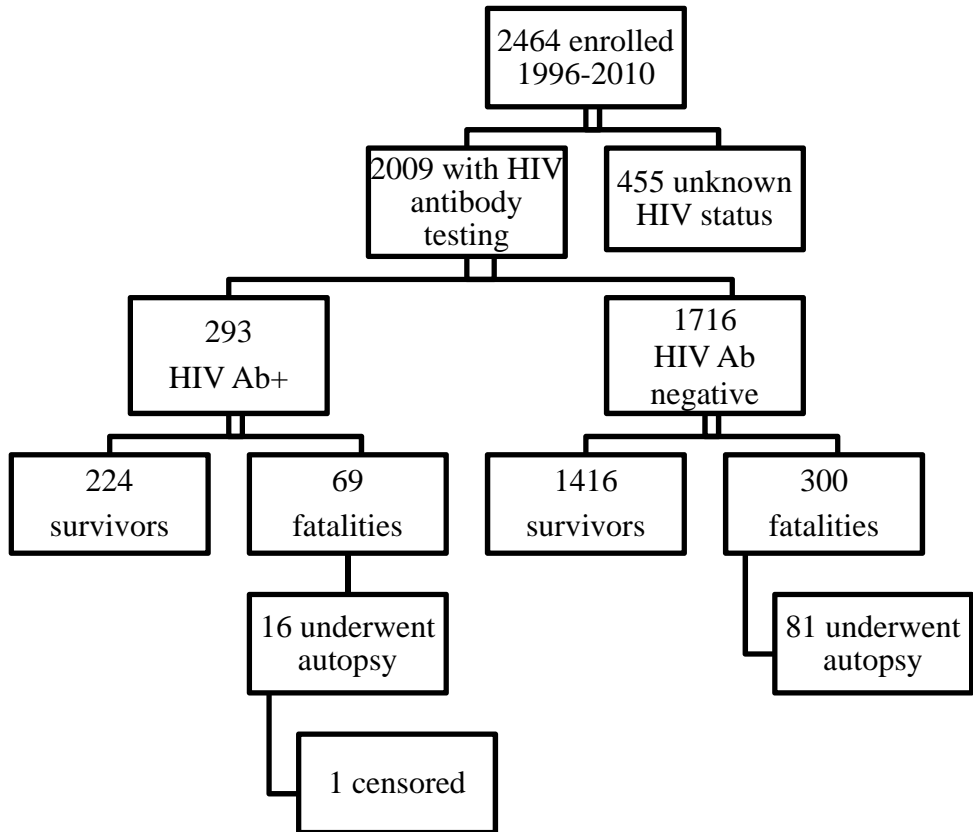

Supplement: mbo005152472sf1.pdf [file mbo005152472sf1.pdf]

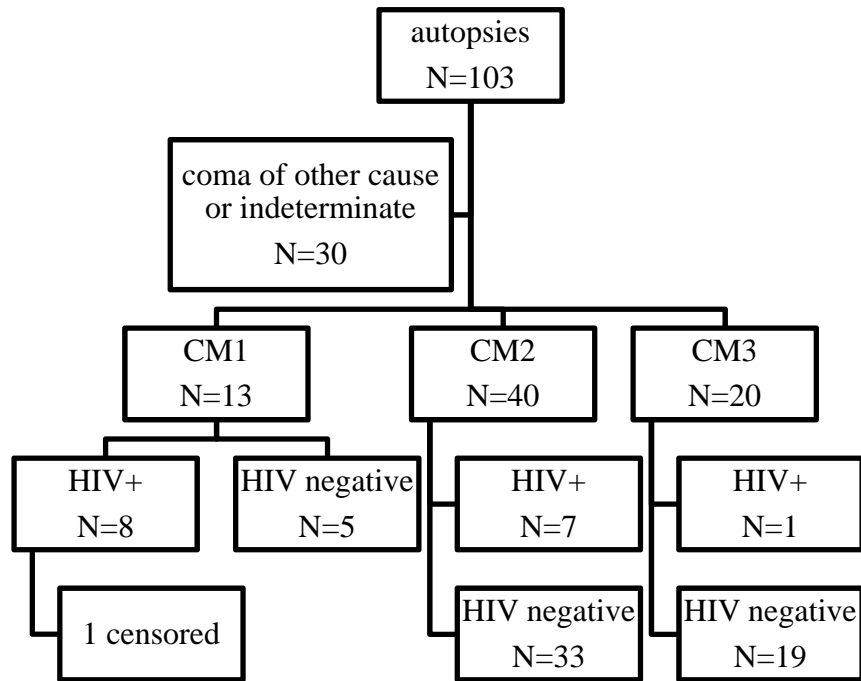

Supplement: mbo005152472sf2.pdf [file mbo005152472sf2.pdf]

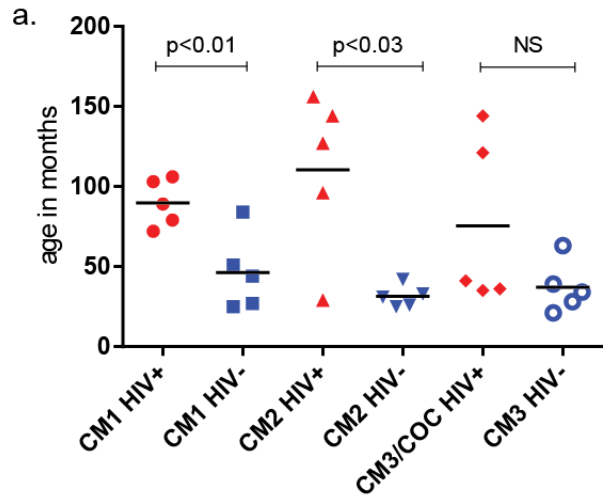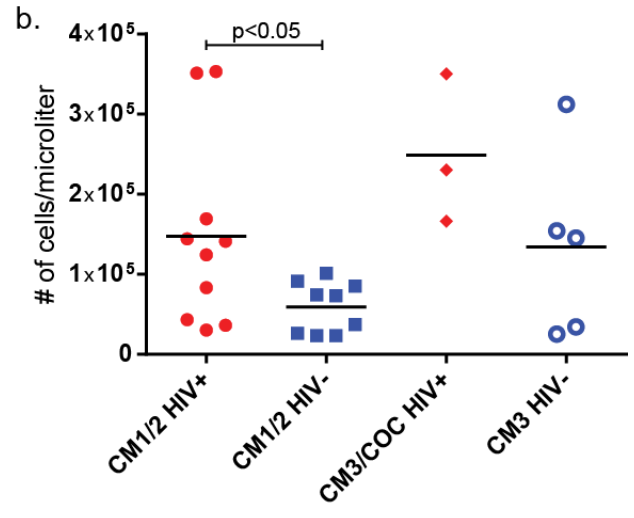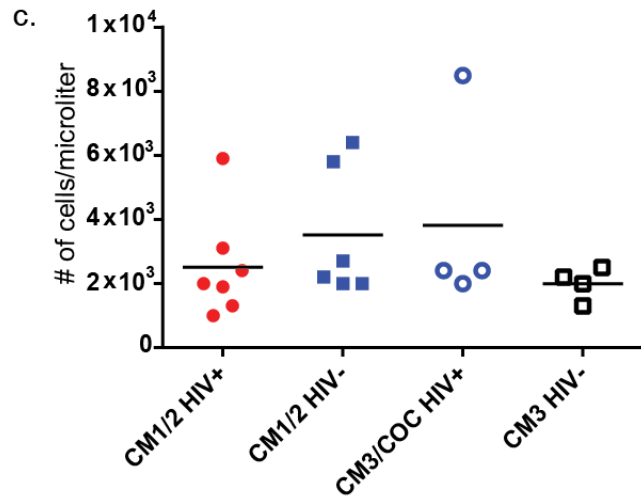

Supplement: mbo005152472sf3.pdf [file mbo005152472sf3.pdf]
